Title:

Temperature but not ocean acidification affects energy metabolism and enzyme activities in the blue mussel, *Mytilus edulis*

Authors:

1. Omera B. Matoo <sup>a,b,\*</sup>

<sup>a</sup>School of Biological Sciences, University of Nebraska-Lincoln, Lincoln, NE 68588.

<sup>b</sup>Department of Biological Sciences, University of North Carolina at Charlotte, Charlotte, NC, 28223.

2. Gisela Lannig

Alfred Wegener Institute, Helmholtz Centre for Polar and Marine Research, Bremerhaven, D-27570, Germany.

3. Christian Bock

Alfred Wegener Institute, Helmholtz Centre for Polar and Marine Research, Bremerhaven, D-27570, Germany.

4. Inna M. Sokolova <sup>b,c</sup>

<sup>c</sup>Department of Marine Biology, Institute of Biological Sciences, University of Rostock, Rostock, Germany

\*corresponding author: [omatoo2@unl.edu](mailto:omatoo2@unl.edu)

Acknowledgements:

The authors thanks Dr. Markus Frederich (University of New England) for assistance with mussel collection in Gulf of Maine. The authors declare that there is no conflict of interest. This work was supported by the US National Science Foundation (NSF) award IOS-1557870 to I.M.S.

Author contributions:

Omera B. Matoo and Inna M. Sokolova conceived the ideas and designed methodology; Omera B. Matoo, Gisela Lannig and Christian Bock collected the data; Omera B. Matoo, Gisela Lannig and Christian Bock analyzed the data; Omera B. Matoo, Gisela Lannig, Christian Bock and Inna M. Sokolova led the writing of the manuscript. All authors contributed critically to the drafts and gave final approval for publication.

Data availability statement:

Supplemental files are available at FigShare. Phenotypic data will be deposited in the Dryad Digital Repository upon publication.

1 SUMMARY

2 1. In mosaic marine habitats such as intertidal zones ocean acidification (OA) is exacerbated by high  
3 variability of pH, temperature, and biological CO<sub>2</sub> production. The non-linear interactions among these  
4 drivers can be context-specific and their effect on organisms in these habitats remains largely unknown,  
5 warranting further investigation.

6 2. We were particularly interested in *Mytilus edulis* (the blue mussel) from intertidal zones of Gulf of  
7 Maine (GOM), USA for this study. GOM is a hot spot of global climate change (average SST increasing  
8 by > 0.2 °C y<sup>-1</sup>) with > 60% decline in mussel population over the past 40 years.

9 3. Here, we utilize bioenergetic underpinnings to identify limits of stress tolerance in *M. edulis* from  
10 GOM exposed to warming and OA. We have measured whole-organism oxygen consumption rates and  
11 metabolic biomarkers in mussels exposed to control and elevated temperatures (10 vs. 15 °C) and  
12 moderate P<sub>CO2</sub> levels (~ 400 vs. 800 µatm).

13 4. Our study demonstrates that adult *M. edulis* from GOM are metabolically resilient to the moderate OA  
14 scenario but responsive to warming as seen in changes in metabolic rate, energy reserves, metabolite  
15 profiles and enzyme activities.

16 5. Our results are in agreement with recent literature that OA scenarios for the next 100-300 years do not  
17 affect this species, possibly as a consequence of maintaining its *in vivo* acid–base balance.

18 Key words: ocean acidification, *Mytilus*, global warming, energy metabolism, NMR based metabolomics

19

20

21

22

23 INTRODUCTION:

24 Continued increase in atmospheric CO<sub>2</sub> and its subsequent uptake by oceans profoundly affects  
25 marine ecosystems (IPCC, 2014). Changes experienced by organisms include increase in global sea  
26 surface temperature (SST) and oceans' partial pressure of CO<sub>2</sub> (P<sub>CO2</sub>), which leads to ocean acidification  
27 (OA) (Doney *et al.*, 2012). Climate change models predict an average increase of 1.8–4.0 °C (with some  
28 estimates as high as 6.4 °C) and a decline by 0.3-0.4 pH units by the year 2100, depending on the CO<sub>2</sub>  
29 emission scenario (IPCC, 2014). Warming and OA can negatively impact marine organisms (Kroeker *et*  
30 *al.*, 2013, 2014). However, in mosaic habitats such as intertidal and coastal zones, the outcome of  
31 multiple drivers, including warming and OA, is complicated by context-specific and non-linear  
32 interactions among the drivers (Gunderson *et al.*, 2016 and references therein) so that the net effect could  
33 be additive, antagonistic or synergistic (Todgham & Stillman, 2013). The species' response to interactive  
34 effects of warming and OA in such environments remains largely unknown and warrants further  
35 investigation (Gunderson *et al.*, 2016).

36 Temperature is a key variable that affects physiology, survival, and distribution of ectotherms  
37 (Kroeker *et al.*, 2013, 2014). Deviation of temperature from the optimum results in disturbance of energy  
38 balance and decrease in aerobic scope of organisms (Pörtner, 2012; Sokolova, 2013; Sokolova *et al.*,  
39 2012). OA negatively affects survival, metabolism, calcification, growth, reproduction and immune  
40 responses across a range of marine taxa (Kroeker *et al.*, 2013). Elevated P<sub>CO2</sub> shifts the acid-base balance  
41 of organisms (Melzner *et al.*, 2009) and most calcifiers have limited capacity to counteract OA-induced  
42 extracellular acidosis (Pörtner, 2008). This in turn can increase the energy costs to maintain cellular and  
43 organismal homeostasis in animals (Ivanina *et al.*, 2020; Pörtner, 2008; Sokolova *et al.*, 2012; Stapp *et*  
44 *al.*, 2018; Stumpp *et al.*, 2012).

45 Responses of marine molluscs to OA are highly variable (Sokolova *et al.*, 2015 and references  
46 therein). Inter- and intrapopulation variability in OA sensitivity has been shown depending on habitat,

47 scales of environmental variability and other concomitant stressors (Vargas *et al.*, 2017; Waldbusser *et*  
48 *al.*, 2015; Parker *et al.*, 2011; Stapp *et al.*, 2017). In mosaic environments local adaptation as well as  
49 temporally and spatially varying selection can select for metabolically plastic, stress-tolerant genotypes  
50 that can maintain optimal phenotypes (including energetic sustainability) in a broad range of  
51 environmental conditions. Importantly, bioenergetic responses can predict tolerance limits under  
52 environmentally realistic scenarios of stress exposure (Sokolova *et al.*, 2012) providing a common  
53 denominator to integrate responses to multiple stressors. Quantifying the independent and interactive  
54 effects of multiple stressors to identify metabolic tipping points is essential to determine the impact of  
55 global climate change on marine organisms and ecosystems (Boyd & Brown, 2015)

56         This study aims to determine the interactive effects of elevated temperature and P<sub>CO2</sub> on energy  
57 metabolism and biomineralization-related enzymes in an ecologically and economically important bivalve  
58 mollusk, the blue mussel *Mytilus edulis* Linnaeus 1758. It is a critical foundation species in coastal  
59 ecosystems (Seed, 1969) that increasingly faces risk of local extinction along the USA east coast (Jones *et*  
60 *al.*, 2009; Sorte *et al.*, 2017). We were particularly interested in mussel populations from intertidal zones  
61 of Gulf of Maine (GOM), USA for this study. GOM is a hot spot of global climate change with > 60%  
62 (range 29-100%) decline in mussel population over the past 40 years (Sorte *et al.*, 2017). Within GOM,  
63 the previous decade has witnessed SST exceeding earlier recorded observations of >150 years and an  
64 average warming of > 0.2 °C y<sup>-1</sup> (Sorte *et al.*, 2017). Mussels inhabiting GOM are thus exposed to one of  
65 the fastest rates of warming in the world, in addition to ocean acidification.

66         The metabolic plasticity of *M. edulis* to the combined effects of elevated P<sub>CO2</sub> and temperature  
67 from GOM is not yet fully understood. Here, we utilize the bioenergetic underpinnings of stress  
68 physiology to identify limits and mechanisms of stress tolerance in *M.edulis*. We have measured whole-  
69 organism oxygen consumption rates and metabolic biomarkers in mussels exposed to control and  
70 moderately elevated temperatures (10 vs. 15 °C) and P<sub>CO2</sub> (~ 400 vs. 800 µatm) to mimic a realistic  
71 scenario of ocean warming and acidification. Standard metabolic rate (SMR) represents the basal energy

72 cost for maintenance and is widely used to assess stress response (Pettersen *et al.*, 2018). To account for  
73 possible tissue-specific variation in responses, we conducted a comprehensive analyses of the  
74 bioenergetic health index by measuring energy related biomarkers (cellular and tissue energy reserves),  
75 metabolic profiles and specific enzyme activities (acid-base regulating enzyme and energy-demanding ion  
76 transport enzymes) in different tissues depending on their physiological role.

## 77 MATERIALS AND METHODS

### 78 Animal maintenance

79 *M. edulis* were collected from Biddeford Pool, GOM (43°26'50.6N, 70°21'19.0W) in summer 2011 and  
80 shipped overnight to the University of North Carolina at Charlotte. Mussels were kept in recirculating  
81 artificial seawater (ASW) (Instant Ocean®, USA) at  $9.6 \pm 0.3$  °C and  $30 \pm 1$  salinity (practical salinity  
82 units), aerated with ambient air for 10 days. Mussels were randomly assigned to four treatment groups  
83 and exposed for four weeks to a combination of two  $P_{CO_2}$  levels representative of present-day conditions  
84 ( $\sim 400$   $\mu\text{atm } P_{CO_2}$ ; normocapnia) and year 2100 projections ( $\sim 800$   $\mu\text{atm } P_{CO_2}$ ; hypercapnia) (IPCC, 2014),  
85 and two temperatures representing the average water temperature at the time of collection (10 °C), and +  
86 5 °C increase predicted for the year 2100 by IPCC (15 °C). Two replicate tanks were set for each  
87 treatment. Normocapnic treatments were bubbled with ambient air whereas for hypercapnia ambient air  
88 was mixed with 100%  $CO_2$  (Roberts Oxygen, USA) using precision mass flow controllers (Cole-Parmer,  
89 USA) to maintain a steady-state pH. Animals were fed *ad libitum* on alternate days with 2 mL per tank of  
90 commercial algal mixture (Shellfish Diet 1800, USA). Mortality was checked daily. ASW were prepared  
91 using the same batch of Instant Ocean® salt to avoid potential variations in water chemistry. Carbonate  
92 chemistry of seawater (Table 1) was determined as described elsewhere (Beniash *et al.*, 2010).

### 93 Standard Metabolic Rate

94 SMR was measured as resting oxygen consumption ( $\dot{M}O_2$ ) of mussels at their respective acclimation  
95 temperature and  $P_{CO_2}$  using microfiber optic oxygen probes (Tx-Type, PreSens GmbH, Germany) as

96 described in Matoo *et al.*, 2013. After measurements, individuals were dissected and dry tissue mass was  
97 calculated from the wet tissue mass assuming an average water content of 80%.

98 SMR was calculated as follows:

$$99 \text{ SMR} = \frac{\Delta P_{O_2} \times \beta_{O_2} \times V_{fl}}{M^{0.8}}$$

101 SMR —oxygen consumption ( $\mu\text{mol O}_2 \text{ g}^{-1} \text{ dry mass h}^{-1}$ ) normalized to 1 g dry mass,  $\Delta P_{O_2}$  — difference  
102 in partial pressure between in- and out-flowing water (kPa),  $\beta_{O_2}$  — oxygen capacity of water ( $\mu\text{mol O}_2 \text{ L}^{-1}$   
103  $\text{kPa}^{-1}$ ),  $V_{fl}$  — flow rate ( $\text{L h}^{-1}$ ),  $M$  —dry tissue mass (g) and 0.8 — allometric coefficient (Bougrier *et al.*,  
104 1995).

105 After acclimation, a subset of mussels was dissected, tissues shock-frozen and stored in liquid nitrogen  
106 for analyses of energy reserves and enzyme activities. Due to limited amount of tissues, we divided  
107 samples for different assays depending on the physiological function of a given tissue. The energy  
108 reserves (lipids, glycogen and/or adenylates) were measured in hepatopancreas (HP) and adductor muscle  
109 that serve as reserve storage sites in bivalves (Cappello *et al.*, 2018). Metabolite profiles were explored by  
110 untargeted metabolomics in two metabolically active aerobic tissues, the gills and the muscle. The effects  
111 of warming and OA on biomineralization were assessed by the activities of three key enzymes involved in  
112 shell formation (carbonic anhydrase (CA), plasma membrane calcium ( $\text{Ca}^{2+}$ ) ATPase and proton ( $\text{H}^+$ )  
113 ATPase) in the mantle tissue as the main organ involved in shell formation.

114

115 Energy reserves:

116 Lipid content was determined using the chloroform extraction method as described in Ivanina *et al.*, 2013.

117 Concentration of lipids were expressed as  $\text{g g}^{-1}$  wet tissue mass. Concentrations of glycogen and adenylates

118 ( $\mu\text{mol g}^{-1}$  wet tissue mass) were measured using standard NADH- or NADPH-linked spectrophotometric  
119 tests described in Ivanina *et al.*, 2013. Adenylate energy charge (AEC) was calculated as follows:

$$120 \quad \text{AEC} = \frac{[\text{ATP}] + 0.5 \times [\text{ADP}]}{[\text{ATP}] + [\text{ADP}] + [\text{AMP}]}$$

122

123 Metabolic profiling based on  $^1\text{H-NMR}$  spectroscopy

124 Muscle and gill tissues were extracted as described elsewhere for untargeted metabolic profiling

125 (Dickinson *et al.*, 2012; Lannig *et al.*, 2010). Extracts were freeze-dried and shipped on dry ice to the

126 Alfred Wegener Institute (Bremerhaven, Germany). Untargeted metabolic profiling using  $^1\text{H-NMR}$

127 spectroscopy was performed using a method modified from Schmidt *et al.*, 2017. 24 metabolites were

128 identified from processed spectra of adductor and gill tissues and quantified using Chenomx NMR suite

129 8.1 (Chenomx Inc. Canada). Metabolic profiles were statistically analyzed using MetaboAnalyst 4.0

130 (Chong *et al.* 2019).

131 Enzyme activities

132 Activities of biomineralization-related enzymes were measured in the mantle edge which is involved in

133 shell deposition (Björnmark *et al.*, 2016; Gazeau *et al.*, 2014)] of *M.edulis*. Protein concentrations were

134 determined using Bradford assay (Bradford, 1976) and used to standardize enzyme activities.

135 a) Carbonic anhydrase (CA)

136 For assessment of carbonic anhydrase (carbonate hydrolyase, EC 4.2.1.1) activity, mantle edge tissue

137 was homogenized as described in Ivanina *et al.*, 2013. CA activity was determined as acetazolamide

138 (AZM)-sensitive esterase activity with 1.5 mM of p-nitrophenyl acetate as a substrate (Gambhir *et al.*,

139 2007) using a temperature-controlled spectrophotometer (VARIAN Cary 50 Bio UV-Vis

140 spectrophotometer, USA). In a separate set of experiments, CA activity was measured at different  
141 temperatures in an environmentally relevant range (5-35 °C) in the gill, mantle, adductor muscle and HP  
142 of the control mussels to characterize the tissue-dependent capacity and temperature sensitivity  
143 (determined by apparent activation energy ( $E_a$ ) and Arrhenius breakpoint temperature (ABT)) of CA  
144 activity.  $E_a$  was determined from an Arrhenius plot of  $\ln(V_{max})$  against  $1/T$  ( $K^{-1}$ ), and ABT was  
145 determined as a point when the slope of Arrhenius plot significantly changed using an algorithm for  
146 multi-segment linear regression (Oosterbaan, 2011).

#### 147 b) $Ca^{2+}$ - and $H^+$ -ATPases

148 Mantle edge tissue was homogenized and activities of  $Ca^{2+}$ -ATPase (EC 3.6.3.8) and  $H^+$ -ATPase (EC  
149 3.6.3.6) was assayed as described in Ivanina *et al.*, 2020. Inorganic phosphate ( $P_i$ ) was measured using  
150 malachite green assay kit (ab65622, Abcam) and ATPase activities were expressed as  $\mu\text{mol of } P_i \mu\text{g}$   
151  $\text{protein}^{-1} \text{ hr}^{-1}$ .

#### 152 Statistical analyses

153 Effects of temperature,  $P_{CO_2}$  and their interaction were assessed for all studied traits using generalized  
154 linear model (GLM) ANOVA. All factors were treated as fixed and post-hoc tests (Fisher's Least  
155 Significant Difference) were used to test differences between group means. Sample sizes were 5–10 for  
156 all experimental groups. Regression analysis for ABT and Arrhenius plots for CA were done using  
157 GraphPad Prism ver. 4.03 (GraphPad Software, Inc.) and SegReg software (Oosterbaan, 2011). For  
158 statistical analysis of the metabolic profiles we used MetaboAnalyst 4.0 (Chong *et al.*, 2019) as described  
159 elsewhere (Rebelein *et al.*, 2018). A partial least square discriminant analysis (PLS-DA) was used for  
160 separation of groups. Important metabolites were ranked based on Variable Importance in Projection  
161 (VIP) score of the PLS-DA. Significantly different metabolites were identified using the Significance  
162 Analysis of Microarray (SAM) approach with a Delta of 0.5 within MetaboAnalyst. Metabolites that



163 showed a particular pattern were identified using PatternHunter analysis within MetaboAnalyst (Pavlidis  
164 & Noble, 2001).

165 Unless otherwise indicated, data are shown as means  $\pm$  standard errors of means (SEM). Differences were  
166 considered significant if probability of Type I error was  $<0.05$ .

## 167 RESULTS:

### 168 Effects of warming and OA on the SMR

169 Warming significantly elevated SMR ( $P < 0.001$ ) of *M.edulis* (Fig. 1A, Table 2). After four weeks  
170 acclimation, SMR was  $\sim 2$ -3 times higher in mussels maintained at 15 °C compared to 10 °C. This effect  
171 was observed under normocapnia ( $P = 0.002$ ) and hypercapnia ( $P = 0.009$ ). OA did not significantly  
172 affect SMR in mussels ( $P = 0.070$ ), although a trend of elevated SMR was observed in OA-exposed  
173 mussels.

### 174 Tissue energy status under warming and OA

175 Warming significantly increased the total lipid content in HP under normocapnia ( $P = 0.05$ ) and  
176 hypercapnia ( $P = 0.001$ ) (Fig. 1B, Table 2). OA did not significantly change the lipid content in HP,  
177 regardless of the temperature ( $P = 0.608$  and  $0.288$  at 10 and 15 °C, respectively).

178 No significant changes were observed for glycogen (Fig. 1C) and adenylates (Fig. 2) content under  
179 warming, OA, or OA combined with warming (OWA) in the muscle of *M.edulis* (Table 2).

### 180 Tissue-specific shifts in metabolite profile under warming and OA

181 Untargeted NMR-based metabolic profiling in gill and muscle of *M. edulis* revealed minor shifts in  
182 metabolite concentrations under warming, OA and OWA. In gills, PLS-DA revealed a significant  
183 separation of 10 °C- and 15°C-acclimated groups (Fig. 3A), indicating a temperature-induced change in  
184 branchial metabolism. According to their VIP scores, DMA and glucose were the main metabolites

185 describing these differences (Fig. 3B). The levels of DMA decreased and glucose levels increased under  
186 warming, regardless of  $P_{CO_2}$  (Fig. 4A). These two metabolites were also identified as significantly  
187 different between the temperature groups by SAM analysis (Fig. 4B). Unlike gills, metabolite profiles of  
188 adductor muscle were not affected by temperature or  $P_{CO_2}$  (see PLS-DA in Supplementary Fig. 3).

189 Effects of warming and OA on enzyme activity

190 CA activity in mantle of *M.edulis* showed an elevated trend under warming (normocapnia,  $P = 0.093$ ;  
191 hypercapnia,  $P = 0.072$ ) but did not under OA ( $P = 0.293$ ) (Fig. 5A, Table 2). When data for normocapnia  
192 and hypercapnia were pooled, a significant increase in CA activity at 15 °C compared to 10 °C ( $P =$   
193 0.018) was detected (Supplemental Fig. 1). Tissue-specific CA activity over a broad temperature range  
194 (5-35 °C) showed a significant effect of two-factor interactions (temperature x tissue,  $P < 0.0001$ ). CA  
195 activity was significantly higher in HP compared to other tissues (Fig. 5B, Table 3). Irrespective of the  
196 tissue, CA activity monotonously increased with increasing temperatures with similar  $E_a$ , and no ABT  
197 (Table 3).

198  $Ca^{2+}$ -ATPase activity from mantle edge of *M.edulis* was significantly affected by warming ( $P = 0.005$ ) but  
199 not OA ( $P = 0.905$ ) (Fig. 6A, Table 2). Warming led to a significant decrease in  $Ca^{2+}$ -ATPase activity  
200 under hypercapnia ( $P = 0.023$ ) but not under normocapnia ( $P = 0.060$ ).

201  $H^+$ -ATPase activity from mantle edge of *M.edulis* was not significantly affected by warming ( $P = 0.862$ )  
202 or OA ( $P = 0.303$ ) (Fig. 6B, Table 2). At 10 °C, hypercapnia led to a decrease in the  $H^+$ -ATPase activity,  
203 but this decrease was non-significant ( $P = 0.06$ ).

204 DISCUSSION

205 Our study demonstrates that adult *M.edulis* from GOM are metabolically resilient to moderate  
206 OA ( $P_{CO_2} \sim 800 \mu\text{atm}$ ) but responsive to warming as seen in changes in whole-body metabolic rate, energy  
207 reserves, metabolite profiles and enzyme activities. The combination of ocean warming and acidification

208 (OWA) did not elicit detrimental metabolic changes in mussels beyond the effect of warming. This  
209 indicates that under these conditions temperature is the dominant factor in determining species'  
210 physiology. The physiological responses of mussels in our study might be related to their ecology in  
211 GOM. There is a high temporal variability in temperature (annual SST range 15.5 °C) in temperate rocky  
212 intertidal pools of GOM throughout the year (Salisbury & Jönsson, 2018). Modelling data indicate that  
213 physical processes (e.g., strong tides, wind-driven mixing) in GOM alter ocean carbonate parameters but  
214 also mitigate the decrease, or even raise pH (Salisbury and Jönsson 2018). Thus, *M. edulis* in this region  
215 are predominantly exposed to large variation in temperature which might explain their plasticity to  
216 thermal stress. Earlier studies in *M.edulis* populations from thermal clines of GOM have shown high  
217 phenotypic plasticity in physiology despite lack of population genetic structure and local adaptation  
218 (Lesser *et al.*, 2010; Lesser, 2016) consistent with the findings of metabolic plasticity to warming found  
219 in our study.

## 220 Effect of Warming and OA on Bioenergetics

221 We observed a ~2-3-fold increase in SMR of mussels exposed to 5 °C warming under  
222 normocapnia or hypercapnia, indicating a strong temperature effect on metabolism with  $Q_{10}$  ~4-6. A 5 °C  
223 increase is well within the range of temperature fluctuations experienced by mussels in GOM (Salisbury  
224 & Jönsson, 2018). Blue mussels are eurythermal and well adapted for 5-20 °C range, with an upper  
225 thermal tolerance limit of ~29 °C for adults (Gosling, 1992). Therefore, temperatures in our study are  
226 within the ecological relevant and even optimal range for this species. Recent meta-analysis also indicates  
227 that temperature threshold for long-term survival of *M. edulis* is ~20 °C (Lupo *et al.*, 2020). Therefore, 20  
228 °C appears to be close to the metabolic optimum of *M. edulis*, so rate-enhancing effects of temperature  
229 dominate over the potentially negative impacts on metabolism as long as warming occurs below the 20 °C  
230 threshold, as in our study.

231 Unlike temperature effect, modest OA had no effect on SMR regardless of the temperature.  
232 Metabolic response to OA in *M. edulis* can vary and depend on magnitude of  $P_{CO_2}$ , food availability, and  
233 population (Fitzer *et al.*, 2014; Hüning *et al.*, 2013; Lesser, 2016; Thomsen *et al.*, 2013; Thomsen &  
234 Melzner, 2010; Zittier *et al.*, 2015). Fitzer *et al.* (2014) have shown that for *M. edulis* at 1000  $\mu\text{atm}$  and  
235 beyond, biomineralization continued but with compensated protein metabolism and shell growth  
236 indicating that  $\sim 1000 \mu\text{atm}$  could be an OA metabolic tipping point for *M. edulis*. In our study,  $P_{CO_2}$  levels  
237 were below this threshold and could explain the physiological tolerance of mussels seen here. Our  
238 hypothesis that  $P_{CO_2}$  could exacerbate the increase of SMR caused by elevated temperature was not  
239 supported in this study. The outcome of OWA on metabolic rate in bivalves is commonly additive; albeit  
240 in other cases the effects of temperature or  $P_{CO_2}$  dominate (see Lefevre 2016 and references therein).  
241 Furthermore, metabolic responses of bivalves to OWA are dependent on the degree of temperature or  
242  $P_{CO_2}$  stress. For example, Lesser *et al.*, 2016 have shown that mussels from GOM showed metabolic  
243 depression as a protective response when exposed to combined stress of higher warming (22 °C) and  
244 modestly elevated  $P_{CO_2}$  (560  $\mu\text{atm}$ ).

245 Temperature (but not OA) had a marked effect on energy reserves in *M. edulis*. We observed an  
246 increase in lipids under warming in HP, under both normocapnia and hypercapnia. In bivalves, lipids are  
247 primarily stored in HP (Giese, 1966) and synthesis, storage and use of lipids show pronounced seasonal  
248 cycles: lipids are accumulated during summer (at high temperature and food availability) and used for  
249 metabolism and initiation of gametogenesis during winter (at low temperature and food availability)  
250 (Fokina *et al.*, 2015). Laboratory studies indicate that lipid accumulation is a direct response to  
251 temperature in mussels (Fokina *et al.*, 2015; Wu *et al.*, 2021) and might reflect a metabolic adjustment for  
252 anticipated reproduction (which requires high energy investment as well as lipid deposition into  
253 developing gametes) in mussels.

254 Unlike lipids, the glycogen store was unresponsive to warming in mussels from GOM. Baltic Sea  
255 mussels also showed no change in glycogen content during warming from 10 to 15 °C and from 15 to 20

256 °C (Wu *et al.*, 2021). Modest hypercapnia likewise had no effect on the glycogen content of adductor  
257 muscle of mussels in our present study. Earlier studies show that impacts of temperature and OA on  
258 glycogen reserves of mussels are threshold dependent. Thus, mussels from GOM showed a marked  
259 decrease in the glycogen content of adductor muscle when exposed to higher temperature (22 °C) alone  
260 and combined with modest acidification (560  $\mu\text{atm}$   $\text{P}_{\text{CO}_2}$ , pH 7.9) (Lesser *et al.*, 2016). The concentrations  
261 of adenylates and AEC in adductor muscle remained at steady-state levels in all exposures, indicating that  
262 cellular energy balance in mussels was maintained under all temperatures and OA scenarios. Overall, our  
263 findings indicate that temperature and OA used in our present study are not energetically stressful to  
264 GOM mussels (at least under ad libitum feeding conditions).

265         Warming alone or OWA altered the metabolite profile of *M. edulis* in a tissue-dependent manner.  
266 Warming from 10 to 15 °C increased glucose and decreased DMA in the gills, whereas adductor muscle  
267 metabolites were not affected. Increased glucose could reflect mobilization of energy reserves to meet  
268 increased tissue energy demand. Furthermore, warming could increase glucose levels via gluconeogenesis  
269 by channeling of amino acids like serine, alanine and glycine into pyruvate and increased activity of the  
270 enzyme phosphoenolpyruvate carboxykinase (PEPCK) (Ellis *et al.*, 2014; Le Moullac *et al.*, 2007). In our  
271 study, we saw a trend for decreased glycine and serine in gills under warming and OWA, suggesting a  
272 potential for increased flux through gluconeogenesis that warrants further investigation. The decrease in  
273 DMA, a common organic osmolyte found in gills of bivalves (Zhang *et al.*, 2011), might osmotically  
274 compensate for elevated glucose in *M. edulis* gills during warming.

275         In *M. edulis*, OA had no effect on the metabolite profile in gills or muscle tissues. Similarly,  
276 metabolite profiling studies with  $\text{P}_{\text{CO}_2} \leq \sim 1,000 \mu\text{atm}$  ( $\text{pH} \geq \sim 7.8$ ) reported no OA-induced alteration in  
277 metabolite levels of bivalves (Dickinson *et al.*, 2012; Ellis *et al.*, 2014; Wei *et al.*, 2015) whereas higher  
278  $\text{P}_{\text{CO}_2}$  ( $\geq 1,500 \mu\text{atm}$ ,  $\text{pH} \leq \sim 7.7$ ) led to a shift in metabolite profiles with alterations in energy metabolism  
279 (Ellis *et al.*, 2014; Lannig *et al.*, 2010; Wei *et al.*, 2015). These findings are consistent with the notion that

280 modest OA is not a metabolic stressor for *M. edulis*, and the studied GOM population follows this general  
281 pattern.

## 282 Effect of Warming and OA on Enzyme Activity

283 In mollusks, CA plays a key role in the maintenance of acid-base homeostasis of all tissues as  
284 well as biomineralization in the mantle (Li *et al.*, 2016; Wang *et al.*, 2017; Ramesh *et al.*, 2020). In *M.*  
285 *edulis*, CA activity increased with acute warming (5-35 °C) in all tissues with similar  $E_a$  values indicating  
286 a concerted whole-body response of this enzyme to warming. No ABT was found for CA activity from 5  
287 to 35 °C indicating high thermal tolerance of this enzyme. We found highest CA levels in HP as  
288 compared to other tissues (gills, muscle and mantle) in *M. edulis*. This might reflect differences in overall  
289 metabolic activity (and therefore, different metabolic CO<sub>2</sub> and proton loads) among the tissues that  
290 require different levels of CA to maintain acid-base balance. Acclimation to 15 °C upregulated CA  
291 activity in a key biomineralizing tissue (the mantle edge) of *M. edulis*. Similarly, long term (15 weeks)  
292 exposure to elevated temperature (27 °C) led to a notable increase in CA activity in bivalves *Crassostrea*  
293 *virginica* and *Mercenaria mercenaria* (Ivanina *et al.*, 2013). This increase is likely linked with the overall  
294 increase in metabolic rates at elevated temperatures and can assist with shell deposition.

295 CA activity remained unchanged in response to OA in mantle edge of *M. edulis*. Previous  
296 studies have shown variable CA responses to OA in bivalves including mussels (Ivanina *et al.*, 2020).  
297 Similar to our findings, CA activity in the mantle of *C. virginica* and *M. mercenaria* remained unchanged  
298 after exposure to elevated P<sub>CO2</sub> (800 µatm) for 2-15 weeks (Ivanina *et al.*, 2013). In contrast, CA activity  
299 in mantle of *M. edulis* decreased after prolonged (6-months) exposure to elevated P<sub>CO2</sub> (750 µatm)  
300 exposure (Fitzer *et al.*, 2014). In oysters, CA accumulated along mantle edge in response to P<sub>CO2</sub> exposure  
301 (2622 µatm, pH 7.50), suggesting an active role of CA in ion-regulation and acid-base balance (Wang *et*  
302 *al.*, 2017). However, the effect of OA on CA activity is threshold dependent; at P<sub>CO2</sub> <1000 µatm mussels  
303 try to compensate for intracellular acid loads instead of decreasing their metabolism (Fitzer *et al.*, 2014;

304 Hüning et al., 2013; Thomsen & Melzner, 2010). Taken together, these data suggest that *M. edulis* in  
305 GOM can upregulate acid-base capacity contributing to their metabolic plasticity towards warming, but  
306 moderate OA has no effect on this trait.

307 As a consequence of maintaining acid–base balance, OA may change concentrations of H<sup>+</sup>,  
308 HCO<sub>3</sub><sup>-</sup>, Ca<sup>2+</sup>, Mg<sup>2+</sup>, and Cl<sup>-</sup> in calcifiers (Fitzer *et al.*, 2014; Ramesh *et al.*, 2017). Ion transport is an  
309 important contributor to energy budget of biomineralization because Ca<sup>2+</sup> transport and removal of excess  
310 protons from the site of biomineralization are ATP-dependent (Ivanina *et al.*, 2020). In GOM mussels,  
311 activity of H<sup>+</sup>-ATPase and Ca<sup>2+</sup>-ATPase- in the mantle remained stable under moderate warming and OA  
312 (except for a modest but significant decline in Ca<sup>2+</sup>-ATPase under OWA). This indicates that the mussels  
313 can maintain ion regulatory fluxes at least in the mantle edge despite variations in temperature and P<sub>CO2</sub>  
314 relevant to near-future climate change. Mussels from other acidified environments like Kiel Fjord also  
315 build and maintain their shells despite fluctuating P<sub>CO2</sub> and pH, partially owing to enhanced ion transport  
316 (Thomsen *et al.*, 2013, 2017). Furthermore, when mussel larvae were raised under OA between 500-1500  
317 µatm P<sub>CO2</sub>, ΔH<sup>+</sup> between calcification site and sea water remained constant, irrespective of P<sub>CO2</sub> (Thomsen  
318 *et al.*, 2013). In *C. virginica* and *M. mercenaria* activities of Ca<sup>2+</sup> ATPase and H<sup>+</sup> ATPase, as well as the  
319 cellular energy costs of Ca<sup>2+</sup> and H<sup>+</sup> transport in the biomineralizing cells (mantle and hemocytes) were  
320 insensitive to ocean acidification (pH 7.8) (Ivanina *et al.*, 2020). This indicates that intertidal species  
321 (such as mussels, oysters and clams) that are adapted to variable temperature and pH in their habitat are  
322 generally tolerant against moderate warming and OA, predicted by the climate change models.

## 323 CONCLUSIONS

324 In this study, we report that adult *M. edulis* from GOM are sensitive to warming but tolerant to  
325 moderate acidification scenario predicted by IPCC for the year 2100. This result also provides an insight  
326 in the natural history of GOM mussels given that in the last decade (2005-2014) GOM was characterized  
327 by an extreme warming trend (Salisbury & Jönsson, 2018). Although this study is limited to adults and

328 does not consider larval stage sensitivity of *M. edulis*, our results support earlier reports that acidification  
329 scenarios for the next 100-300 years do not affect this species (Telesca *et al.*, 2019). Taken together, our  
330 study provides important data about extant levels of plasticity in physiology of mussels as well as insights  
331 into potential sensitivity of mussels to future global change.

332



333 REFERENCES

- 334 Beniash, E., Ivanina, A., Lieb, N., Kurochkin, I., & Sokolova, I. (2010). Elevated level of carbon dioxide  
335 affects metabolism and shell formation in oysters *Crassostrea virginica*. *Marine Ecology Progress*  
336 *Series*, 419, 95–108. <https://doi.org/10.3354/meps08841>
- 337 Bjärnmark, N., Yarra, T., Churcher, A., Felix, R., Clark, M., & Power, D. (2016). Transcriptomics  
338 provides insight into *Mytilus galloprovincialis* (Mollusca: Bivalvia) mantle function and its role in  
339 biomineralisation. *Marine Genomics*, 27, 37–45. <https://doi.org/10.1016/j.margen.2016.03.004>
- 340 Bougrier, S., Geairon, P., Deslous-Paoli, J.M., Bacher, C., Jonquieres, G. Allometric relationships and  
341 effects of temperature on clearance and oxygen consumption rates of *Crassostrea gigas* (Thunberg)  
342 (1995). *Aquaculture*, 134, 143–154. [http://dx.doi.org/10.1016/0044-8486\(95\)00036-2](http://dx.doi.org/10.1016/0044-8486(95)00036-2)
- 343 Boyd, P., & Brown, C. (2015). Modes of interactions between environmental drivers and marine biota.  
344 *Frontiers in Marine Science*, 2, 9. <https://doi.org/10.3389/fmars.2015.00009>
- 345 Bradford, M. (1976). A rapid and sensitive method for the quantitation of microgram quantities of protein  
346 utilizing the principle of protein-dye binding. *Analytical Biochemistry*, 72 (1–2), 248–254.  
347 [http://dx.doi.org/10.1016/0003-2697\(76\)90527-3](http://dx.doi.org/10.1016/0003-2697(76)90527-3)
- 348 Cappello, T., Giannetto, A., Parrino, V., Maisano, M., Oliva, S., De Marco, G., ... Fasulo, S. (2018).  
349 Baseline levels of metabolites in different tissues of mussel *Mytilus galloprovincialis* (Bivalvia:  
350 Mytilidae). *Comparative Biochemistry and Physiology Part D: Genomics and Proteomics*, 26, 32–  
351 39. <http://dx.doi.org/10.1016/j.cbd.2018.03.005>
- 352 Chong, J., Wishart, D. S., & Xia, J. (2019). Using MetaboAnalyst 4.0 for comprehensive and integrative  
353 metabolomics data analysis. *Current Protocols in Bioinformatics*, 68(1), e86.  
354 <http://dx.doi.org/10.1002/cpbi.86>

- 355 Dickinson, G. H., Ivanina, A. V., Matoo, O. B., Pörtner, H. O., Lannig, G., Bock, C., ... Sokolova, I. M.  
356 (2012). Interactive effects of salinity and elevated CO<sub>2</sub> levels on juvenile eastern oysters,  
357 *Crassostrea virginica*. *Journal of Experimental Biology*, 215(1), 29–43.  
358 <http://dx.doi.org/10.1242/jeb.061481>
- 359 Doney, S., Ruckelshaus, M., Duffy, J., Barry, J., Chan, F., English, C., ... Knowlton, N. (2012). Climate  
360 change impacts on marine ecosystems. *Annual Review of Marine Sciences*, 4, 11–37.  
361 <http://dx.doi.org/10.1146/annurev-marine-041911-111611>
- 362 Ellis, R., Spicer, J., Byrne, J., Sommer, U., Viant, M., White, D., & Widdicombe, S. (2014). <sup>1</sup>H NMR  
363 metabolomics reveals contrasting response by male and female mussels exposed to reduced  
364 seawater pH, increased temperature, and a pathogen. *Environmental Science & Technology*, 48(12),  
365 7044–7052. <http://dx.doi.org/10.1021/es501601w>
- 366 Fitzer, S., Phoenix, V., Cusack, M., & Kamenos, N. (2014). Ocean acidification impacts mussel control  
367 on biomineralisation. *Scientific Reports*, 4, 6218. <http://dx.doi.org/10.1038/srep06218>
- 368 Fokina, N., Lysenko, L., Sukhovskaya, I., Vdovichenko, E., Borvinskaya, E., Kantserova, N., ...  
369 Vysotskaya, R. (2015). Biochemical response of blue mussels *Mytilus edulis* L. from the white sea  
370 to rapid changes in ambient temperature. *Journal of Evolutionary Biochemistry and Physiology*,  
371 51(5), 378–387. <http://dx.doi.org/10.1134/S0022093015050038>
- 372 Gambhir, K., Ornasir, J., Headings, V., & Bonar, A. (2007). Decreased total carbonic anhydrase esterase  
373 activity and decreased levels of carbonic anhydrase 1 isozyme in erythrocytes of type II diabetic  
374 patients. *Biochemical Genetics*, 45(5–6), 431–439. <http://dx.doi.org/10.1007/s10528-007-9086-x>
- 375 Gazeau, F., Alliouane, S., Bock, C., Bramanti, L., López Correa, M., Gentile, M., ... Ziveri, P. (2014).  
376 Impact of ocean acidification and warming on the Mediterranean mussel (*Mytilus galloprovincialis*).  
377 *Frontiers in Marine Science*, 1, 62. <http://dx.doi.org/10.3389/fmars.2014.00062>

- 378 Giese, A. (1966). Lipids in the economy of marine invertebrates. *Physiological Reviews*, 46(2), 244–298.
- 379 Gosling, E. (1992). *The mussel Mytilus: ecology, physiology, genetics and culture*. Amsterdam:Elsevier.
- 380 Gunderson, A., Armstrong, E., & Stillman, J. (2016). Multiple stressors in a changing world: the need for  
381 an improved perspective on physiological responses to the dynamic marine environment. *Annual*  
382 *Review of Marine Science*, 8, 357–378. <http://dx.doi.org/10.1146/annurev-marine-122414-033953>
- 383 Hüning, A., Melzner, F., Thomsen, J., Gutowska, M., Krämer, L., Frickenhaus, S., ... Lucassen, M.  
384 (2013). Impacts of seawater acidification on mantle gene expression patterns of the Baltic Sea blue  
385 mussel: implications for shell formation and energy metabolism. *Marine Biology*, 160(8), 1845–  
386 1861. <http://dx.doi.org/10.1007/s00227-012-1930-9>
- 387 IPCC, 2014: *Climate Change 2014: Synthesis Report*. Contribution of working groups I, II and III to the  
388 fifth assessment report of the Intergovernmental Panel on Climate Change [Core Writing Team,  
389 R.K. Pachauri and L.A. Meyer (eds.)]. IPCC, Geneva, Switzerland.
- 390 Ivanina, A., Jarrett, A., Bell, T., Rimkevicius, T., Beniash, E., & Sokolova, I. (2020). Effects of seawater  
391 salinity and pH on cellular metabolism and enzyme activities in biomineralizing tissues of marine  
392 bivalves. *Comparative Biochemistry and Physiology Part A: Molecular & Integrative Physiology*,  
393 248, 110748. <http://dx.doi.org/10.1016/j.cbpa.2020.110748>
- 394 Ivanina, A. V., Dickinson, G. H., Matoo, O. B., Bagwe, R., Dickinson, A., Beniash, E., & Sokolova, I. M.  
395 (2013). Interactive effects of elevated temperature and CO<sub>2</sub> levels on energy metabolism and  
396 biomineralization of marine bivalves *Crassostrea virginica* and *Mercenaria mercenaria*.  
397 *Comparative Biochemistry and Physiology - A Molecular and Integrative Physiology*, 166(1), 101-  
398 111. <http://dx.doi.org/10.1016/j.cbpa.2013.05.016>
- 399 Jones, S., Mieszkowska, N., & Wethey, D. (2009). Linking thermal tolerances and biogeography: *Mytilus*  
400 *edulis* (L.) at its southern limit on the east coast of the United States. *The Biological Bulletin*,

- 401 217(1), 73–85.
- 402 Kroeker, K., Gaylord, B., Hill, T., Hosfelt, J., Miller, S., & Sanford, E. (2014). The role of temperature in  
403 determining species' vulnerability to ocean acidification: a case study using *Mytilus*  
404 *galloprovincialis*. *PloS One*, 9(7). <http://dx.doi.org/10.1371/journal.pone.0100353>
- 405 Kroeker, K., Kordas, R., Crim, R., Hendriks, I., Ramajo, L., Singh, G., ... Gattuso, J. (2013). Impacts of  
406 ocean acidification on marine organisms: quantifying sensitivities and interaction with warming.  
407 *Global Change Biology*, 19(6), 1884–1896. <http://dx.doi.org/10.1111/gcb.12179>
- 408 Lannig, G., Eilers, S., Pörtner, H., Sokolova, I., & Bock, C. (2010). Impact of ocean acidification on  
409 energy metabolism of oyster, *Crassostrea gigas*—changes in metabolic pathways and thermal  
410 response. *Marine Drugs*, 8(8), 2318–2339. <http://dx.doi.org/10.3390/md8082318>
- 411 Lefevre, S. (2016) Are global warming and ocean acidification conspiring against marine ectotherms? A  
412 meta-analysis of the respiratory effects of elevated temperature, high CO<sub>2</sub> and their interaction.  
413 *Conservation Physiology*, 4, 1– 31. <http://dx.doi.org/10.1093/conphys/cow009>
- 414 Le Moullac, G., Bacca, H., Huvet, A., Moal, J., Pouvreau, S., & Van Wormhoudt, A. (2007).  
415 Transcriptional regulation of pyruvate kinase and phosphoenolpyruvate carboxykinase in the  
416 adductor muscle of the oyster *Crassostrea gigas* during prolonged hypoxia. *Journal of Experimental*  
417 *Zoology Part A: Ecological Genetics and Physiology*, 307(7), 371–382.  
418 <https://doi.org/10.1002/jez.390>
- 419 Lesser, M. (2016). Climate change stressors cause metabolic depression in the blue mussel, *Mytilus*  
420 *edulis*, from the Gulf of Maine. *Limnology and Oceanography*, 61(5), 1705–1717.  
421 <http://dx.doi.org/10.1002/lno.10326>
- 422 Lesser, M., Bailey, M., Merselis, D., & Morrison, J. (2010). Physiological response of the blue mussel  
423 *Mytilus edulis* to differences in food and temperature in the Gulf of Maine. *Comparative*

- 424 Biochemistry and Physiology Part A: Molecular & Integrative Physiology, 156(4), 541–551.  
425 <http://dx.doi.org/10.1016/j.cbpa.2010.04.012>
- 426 Li, S., Liu, C., Huang, J., Liu, Y., Zhang, S., Zheng, G., ... Zhang, R. (2016). Transcriptome and  
427 biomineralization responses of the pearl oyster *Pinctada fucata* to elevated CO<sub>2</sub> and temperature.  
428 Scientific Reports, 6, 18943. <http://dx.doi.org/10.1038/srep18943>
- 429 Lupo, C., Bougeard, S., Le Bihan, V., Blin, J., Allain, G., Azéma, P., ... Le Bouquin, S. (2020). Mortality  
430 of marine mussels *Mytilus edulis* and *M. galloprovincialis*: systematic literature review of risk  
431 factors and recommendations for future research. Reviews in Aquaculture, n/a(n/a). doi:  
432 10.1111/raq.12484
- 433 Matoo, O., Ivanina, A. V., Ullstad, C., Beniash, E., & Sokolova, M. I. (2013). Interactive effects of  
434 elevated temperature and CO<sub>2</sub> levels on metabolism and oxidative stress in two common marine  
435 bivalves (*Crassostrea virginica* and *Mercenaria mercenaria*). Comparative Biochemistry and  
436 Physiology - A Molecular and Integrative Physiology, 164(4), 545-53.  
437 <http://dx.doi.org/10.1016/j.cbpa.2012.12.025>
- 438 Melzner, F., Gutowska, M., Langenbuch, M., Dupont, S., Lucassen, M., Thorndyke, M., ... Pörtner, H. O.  
439 (2009). Physiological basis for high CO<sub>2</sub> tolerance in marine ectothermic animals: pre-adaptation  
440 through lifestyle and ontogeny? Biogeosciences, 6(10), 2313–2331. [http://dx.doi.org/10.5194/bg-6-](http://dx.doi.org/10.5194/bg-6-2313-2009)  
441 2313-2009
- 442 Oosterbaan, R. (2011). SegReg: segmented linear regression with breakpoint and confidence intervals.  
443 <http://www.waterlog.info/segreg.htm>.
- 444 Parker, L., Ross, P., & O'Connor, W. (2011). Populations of the Sydney rock oyster, *Saccostrea*  
445 glomerata, vary in response to ocean acidification. Marine Biology, 158(3), 689–697.  
446 <http://dx.doi.org/10.1007/s00227-010-1592-4>

- 447 Pavlidis, P., & Noble, W. S. (2001). Analysis of strain and regional variation in gene expression in mouse  
448 brain. *Genome Biology*, 2(10), research0042.1 research0042.1–0042.15. <https://doi.org/10.1186/gb->  
449 2001-2-10-research0042
- 450 Pettersen, A., Marshall, D., & White, C. (2018). Understanding variation in metabolic rate. *Journal of*  
451 *Experimental Biology*, 221(1), jeb166876. <http://dx.doi.org/10.1242/jeb.166876>
- 452 Pörtner, H. (2008). Ecosystem effects of ocean acidification in times of ocean warming: a physiologist's  
453 view. *Marine Ecology Progress Series*, 373, 203–217. <http://dx.doi.org/10.3354/meps07768>
- 454 Pörtner, H. (2012). Integrating climate-related stressor effects on marine organisms: unifying principles  
455 linking molecule to ecosystem-level changes. *Marine Ecology Progress Series*, 470, 273–290.  
456 <http://dx.doi.org/10.3354/meps10123>
- 457 Ramesh, K, Hu, M., Thomsen, J., Bleich, M., & Melzner, F. (2017). Mussel larvae modify calcifying  
458 fluid carbonate chemistry to promote calcification. *Nature Communications*, 8, 1709.  
459 <http://dx.doi.org/10.1038/s41467-017-01806-8>
- 460 Ramesh, Kirti, Hu, M. Y., Melzner, F., Bleich, M., & Himmerkus, N. (2020). *Journal of Comparative*  
461 *Physiology B.*, 190, 691–700. <http://dx.doi.org/10.1007/s00360-020-01303-3>
- 462 Rebelein, A., Pörtner, H., & Bock, C. (2018). Untargeted metabolic profiling reveals distinct patterns of  
463 thermal sensitivity in two related notothenioids. *Comparative Biochemistry and Physiology Part A:*  
464 *Molecular & Integrative Physiology*, 217, 43–54. <http://dx.doi.org/10.1016/j.cbpa.2017.12.012>
- 465 Salisbury, J., & Jönsson, B. (2018). Rapid warming and salinity changes in the Gulf of Maine alter  
466 surface ocean carbonate parameters and hide ocean acidification. *Biogeochemistry*, 141(3), 401–  
467 418. <http://dx.doi.org/10.1007/s10533-018-0505-3>
- 468 Schmidt, M., Windisch, H., Ludwichowski, K., Seegert, S., Pörtner, H., Storch, D., & Bock, C. (2017).

- 469 Differences in neurochemical profiles of two gadid species under ocean warming and acidification.  
470 *Frontiers in Zoology*, 14(1), 1–13. <http://dx.doi.org/10.1186/s12983-017-0238-5>
- 471 Seed, R. (1969). The ecology of *Mytilus edulis* L. (Lamellibranchiata) on exposed rocky shores.  
472 *Oecologia*, 3(3), 317–350.
- 473 Sokolova, I. (2013). Energy-limited tolerance to stress as a conceptual framework to integrate the effects  
474 of multiple stressors. *Integrative and Comparative Biology*, 53(4), 597–608.  
475 <http://dx.doi.org/10.1093/icb/ict028>
- 476 Sokolova, I., Frederich, M., Bagwe, R., Lannig, G., & Sukhotin, A. (2012). Energy homeostasis as an  
477 integrative tool for assessing limits of environmental stress tolerance in aquatic invertebrates.  
478 *Marine Environmental Research*, 79, 1–15. <http://dx.doi.org/10.1016/j.marenvres.2012.04.003>
- 479 Sokolova, I.M., Matoo, O.B., Dickinson, G., Beniash, E. (2015). Physiological effects of ocean  
480 acidification on animal calcifiers. In Whiteley, S.N., Solan, M. (Eds.) *Stressors in the Marine*  
481 *Environments* (pp. 36-55). Oxford: Oxford University Press.
- 482 Sorte, C., Davidson, V., Franklin, M., Benes, K., Doellman, M., Etter, R. J., ... Menge, B. A. (2017).  
483 Long-term declines in an intertidal foundation species parallel shifts in community composition.  
484 *Global Change Biology*, 23(1), 341–352. <http://dx.doi.org/10.1111/gcb.13425>
- 485 Stapp, L., Parker, L., O'Connor, W., Bock, C., Ross, P., Poertner, H., & Lannig, G. (2018). Sensitivity to  
486 ocean acidification differs between populations of the Sydney rock oyster: role of filtration and ion-  
487 regulatory capacities. *Marine Environmental Research*, 135, 103–113.  
488 <http://dx.doi.org/10.1016/j.marenvres.2017.12.017>
- 489 Stapp, L., Thomsen, J., Schade, H., Bock, C., Melzner, F., Pörtner, H., & Lannig, G. (2017). Intra-  
490 population variability of ocean acidification impacts on the physiology of Baltic blue mussels  
491 (*Mytilus edulis*): integrating tissue and organism response. *Journal of Comparative Physiology B*,

- 492 187(4), 529–543. <http://dx.doi.org/10.1007/s00360-016-1053-6>
- 493 Stumpp, M., Trübenbach, K., Brennecke, D., Hu, M. Y., & Melzner, F. (2012). Resource allocation and  
494 extracellular acid–base status in the sea urchin *Strongylocentrotus droebachiensis* in response to  
495 CO<sub>2</sub> induced seawater acidification. *Aquatic Toxicology*, 110, 194–207.  
496 <http://dx.doi.org/10.1016/j.aquatox.2011.12.020>
- 497 Telesca, L., Peck, L., Sanders, T., Thyrring, J., Sejr, M., & Harper, E. (2019). Biomineralization plasticity  
498 and environmental heterogeneity predict geographical resilience patterns of foundation species to  
499 future change. *Global Change Biology*, 25(12), 4179–4193. <http://dx.doi.org/10.1111/gcb.14758>
- 500 Thomsen, J., Casties, I., Pansch, C., Körtzinger, A., & Melzner, F. (2013). Food availability outweighs  
501 ocean acidification effects in juvenile *Mytilus edulis*: laboratory and field experiments. *Global*  
502 *Change Biology*, 19(4), 1017–1027. <https://doi.org/10.1111/gcb.12109>
- 503 Thomsen, J., & Melzner, F. (2010). Moderate seawater acidification does not elicit long-term metabolic  
504 depression in the blue mussel *Mytilus edulis*. *Marine Biology*, 157(12), 2667–2676.  
505 <http://dx.doi.org/10.1007/s00227-010-1527-0>
- 506 Thomsen, J., Stapp, L., Haynert, K., Schade, H., Danelli, M., Lannig, G., ... Melzner, F. (2017). Naturally  
507 acidified habitat selects for ocean acidification–tolerant mussels. *Science Advances*, 3(4), e1602411.  
508 <http://dx.doi.org/10.1126/sciadv.1602411>
- 509 Todgham, A., & Stillman, J. (2013). Physiological responses to shifts in multiple environmental stressors:  
510 relevance in a changing world. *Integrative and Comparative Biology*, 53(4), 539–544.  
511 <http://dx.doi.org/10.1093/icb/ict086>
- 512 Vargas, C., Lagos, N., Lardies, M., Duarte, C., Manríquez, P., Aguilera, V., ... Dupont, S. (2017).  
513 Species-specific responses to ocean acidification should account for local adaptation and adaptive  
514 plasticity. *Nature Ecology & Evolution*, 1(4), 84. <http://dx.doi.org/10.1038/s41559-017-0084>



- 515 Waldbusser, G., Hales, B., Langdon, C., Haley, B., Schrader, P., Brunner, E., ... Gimenez, I. (2015).  
516 Saturation-state sensitivity of marine bivalve larvae to ocean acidification. *Nature Climate Change*,  
517 5(3), 273–280. <http://dx.doi.org/10.1038/nclimate2479>
- 518 Wang, X., Wang, M., Jia, Z., Song, X., Wang, L., & Song, L. (2017). A shell-formation related carbonic  
519 anhydrase in *Crassostrea gigas* modulates intracellular calcium against CO<sub>2</sub> exposure: Implication  
520 for impacts of ocean acidification on mollusk calcification. *Aquatic Toxicology*, 189, 216–228.  
521 <http://dx.doi.org/10.1016/j.aquatox.2017.06.009>
- 522 Wei, L., Wang, Q., Ning, X., Mu, C., Wang, C., Cao, R., ... Zhao, J. (2015). Combined metabolome and  
523 proteome analysis of the mantle tissue from Pacific oyster *Crassostrea gigas* exposed to elevated  
524 pCO<sub>2</sub>. *Comparative Biochemistry and Physiology Part D: Genomics and Proteomics*, 13, 16–23.  
525 <http://dx.doi.org/10.1016/j.cbd.2014.12.001>
- 526 Wu, F., Sokolov, E., Dellwig, O., & Sokolova, I. (2021). Season-dependent effects of ZnO nanoparticles  
527 and elevated temperature on bioenergetics of the blue mussel *Mytilus edulis*. *Chemosphere*, 263,  
528 127780. <https://doi.org/10.1016/j.chemosphere.2020.127780>
- 529 Zhang, L., Liu, X., You, L., Zhou, D., Wu, H., Li, L., ... Yu, J. (2011). Metabolic responses in gills of  
530 Manila clam *Ruditapes philippinarum* exposed to copper using NMR-based metabolomics. *Marine*  
531 *Environmental Research*, 72(1), 33–39. <http://dx.doi.org/10.1016/j.marenvres.2011.04.002>
- 532 Zittier, Z., Bock, C., Lannig, G. and Pörtner, H.O. (2015). Impact of ocean acidification on thermal  
533 tolerance and acid–base regulation of *Mytilus edulis* (L.) from the North Sea. *Journal of Experimental*  
534 *Marine Biology and Ecology*, 473, 16-25. <https://doi.org/10.1016/j.jembe.2015.08.001>
- 535
- 536

537 FIGURE LEGENDS

538 Figure 1: Oxygen consumption rates and tissue energy reserves of *M. edulis* exposed to different  
539 temperatures and  $P_{CO_2}$ .

540 A — oxygen consumption rates ( $\dot{M}O_2$ ), B — total lipids in hepatopancreas and C — glycogen in  
541 adductor muscle. X-axis —temperature. Within each graph, different letters indicate means are  
542 significantly different between temperatures within the same  $P_{CO_2}$  group ( $P<0.05$ ). Asterisks (\*) indicate  
543 values that are significantly different between normocapnia and hypercapnia within the same temperature  
544 ( $P<0.05$ ). Vertical bars represent SEM. For  $\dot{M}O_2$ , N = 8–10. For lipids and glycogen, N = 6–10.

545

546 Figure 2: Tissue concentrations of adenylates of *M. edulis* exposed to different temperatures and  $P_{CO_2}$ .

547 A – ATP, B – ADP, C – AMP and D – adenylate energy charge (AEC). If the columns have no letters, the  
548 respective means are not significantly different between different  $P_{CO_2}$  and temperature ( $P>0.05$ ). Vertical  
549 bars represent SEM. N = 6.

550

551 Figure 3: PLS-DA analysis of metabolite profiles in the gill tissues of *M. edulis* exposed to different  
552 temperatures and  $P_{CO_2}$ .

553 A – 3D-loading plot of first three components separating the metabolic profiles from Warming and OWA  
554 groups (blueish dots) from control (red dots). The OA group (green dots) did not separated from control.  
555 B –Important metabolites identified by PLS-DA. The colored squares on the right show group specific  
556 relative changes in metabolite concentration. Groups: Ctr – control (acclimated at 10 °C and  
557 normocapnia), OA – ocean acidification (acclimated at 10 °C and hypercapnia), W – warming  
558 (acclimated at 15°C and normocapnia), OWA – ocean warming and acidification (acclimated at 15 °C  
559 and hypercapnia)

560 Figure 4A: Tissue levels (given in normalized concentrations) of DMA and glucose in gill tissues of *M.*  
561 *edulis* exposed to different temperatures and  $P_{CO_2}$ .

562 Groups: Ctr – control (acclimated at 10 °C and normocapnia), OA – ocean acidification (acclimated at 10  
563 °C and hypercapnia), W – warming (acclimated at 15 °C and normocapnia), OWA – ocean warming and  
564 acidification (acclimated at 15 °C and hypercapnia).

565

566 Figure 4B: Significance Analysis of Microarray (SAM) plot of gill tissue.

567 Scatter plot showing observed relative differences on the axis of ordinates against the expected relative  
568 differences estimated by data permutation on the abscise using a delta of 0.5 (dotted lines). The green dots  
569 are highlighting significant differences and correspond to DMA and glucose.

570

571 Figure 5: Carbonic anhydrase (CA) activity in tissues of *M.edulis*.

572 A— CA activity in mantle edge exposed to different temperature and  $P_{CO_2}$ . B— tissue-specific variation in  
573 specific activities of carbonic anhydrase with temperature. Vertical bars represent standard errors of  
574 means. HP-hepatopancreas. If the columns have no letters, the respective means are not significantly  
575 different ( $P>0.05$ ). Vertical bars represent SEM. N= 5–7.

576

577 Figure 6: ATPases activity in mantle edge of *M.edulis* exposed to different temperatures and  $P_{CO_2}$  levels.

578 A – calcium ( $Ca^{2+}$ ) ATPase and B – proton ( $H^+$ ) ATPase. If the columns share letters or have no letters,  
579 the respective means are not significantly different ( $P>0.05$ ). Asterisks (\*) indicate values that are  
580 significantly different between normocapnia and hypercapnia within the same temperature ( $P<0.05$ ).  
581 Vertical bars represent SEM. N= 5-6.

582

583 Figure 1

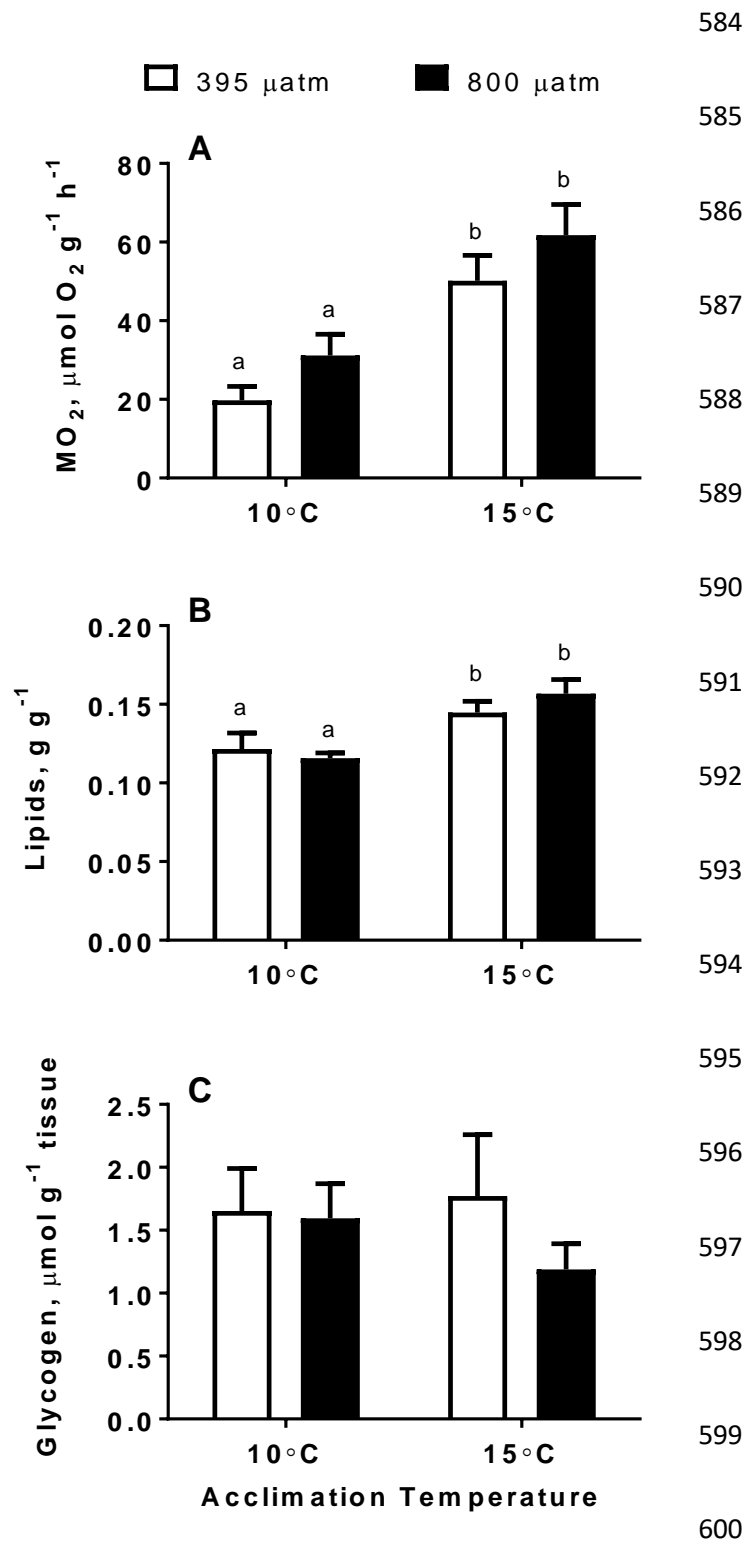

601 Figure 2

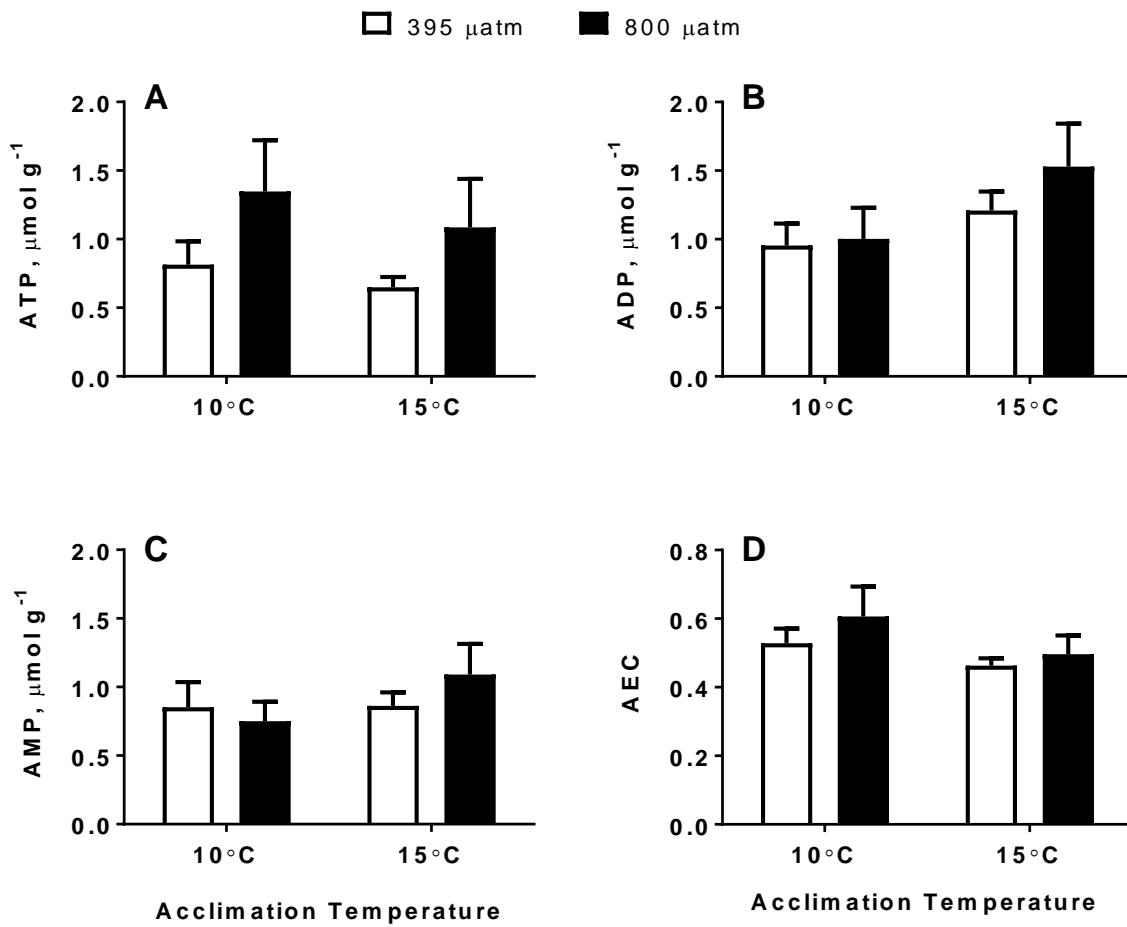

602

603

604

605

606

607

608

609 Figure 3

610 A

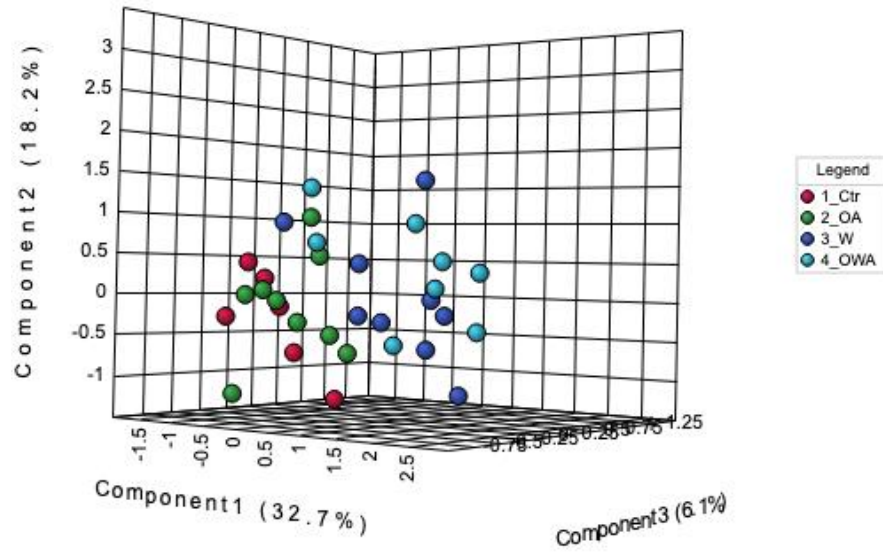

611

612 B

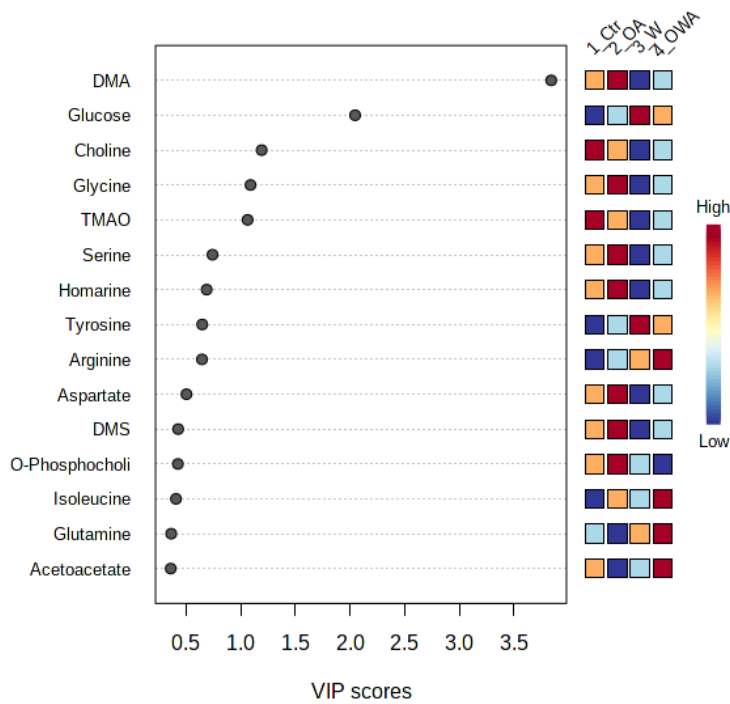

613

614 Figure 4

615 A

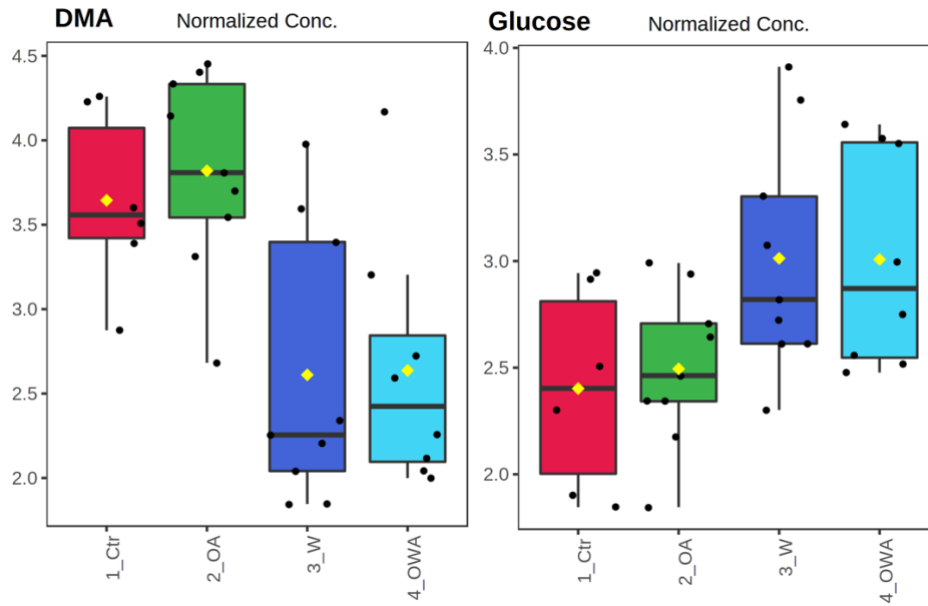

616

617 B

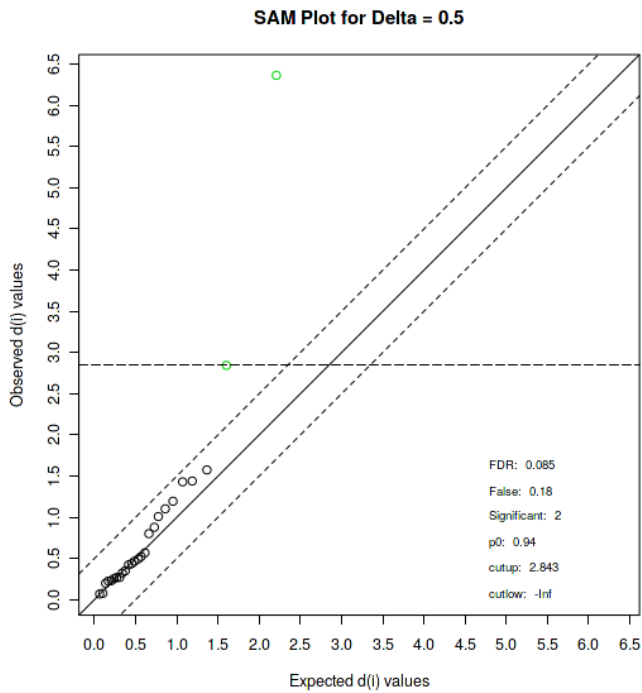

618

619 Figure 5

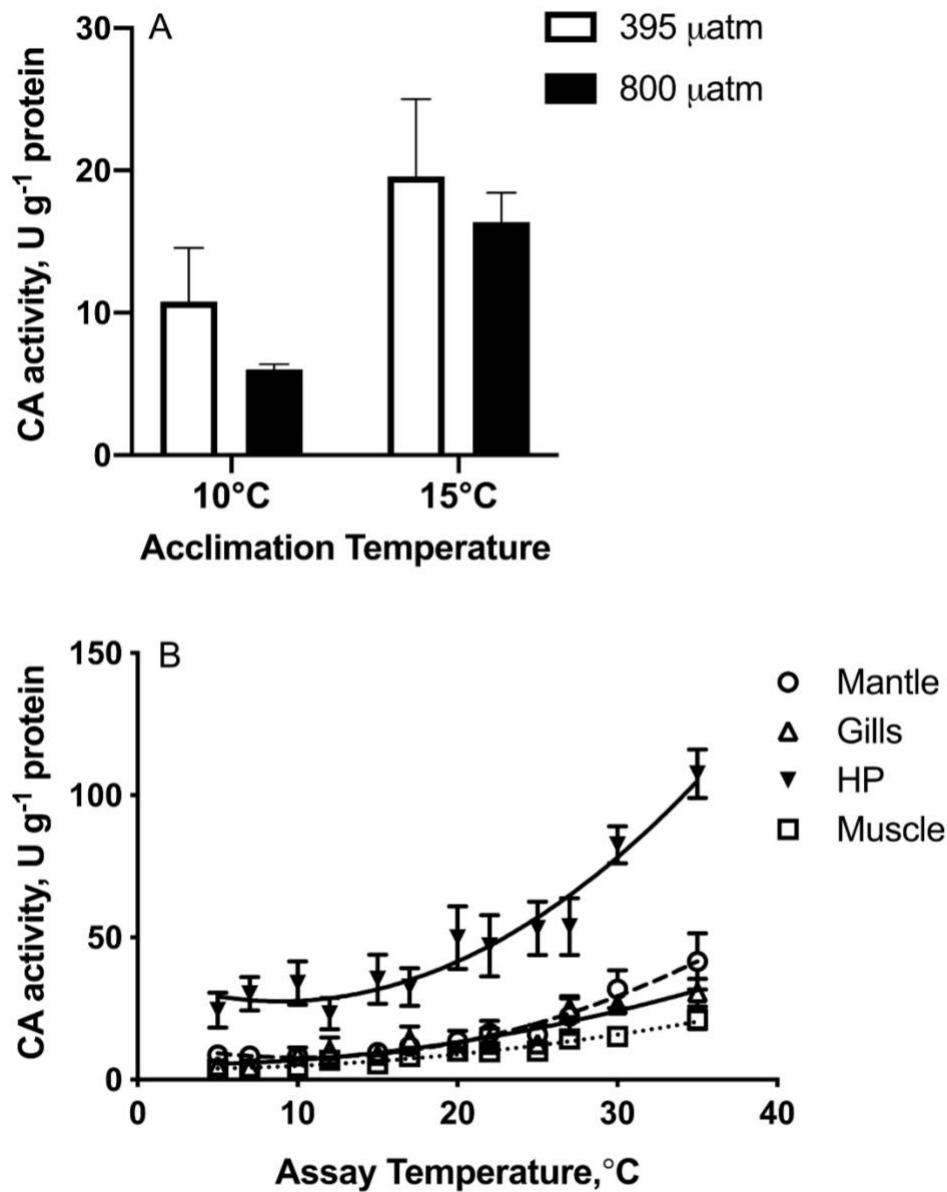

633

634

635



636 Figure 6

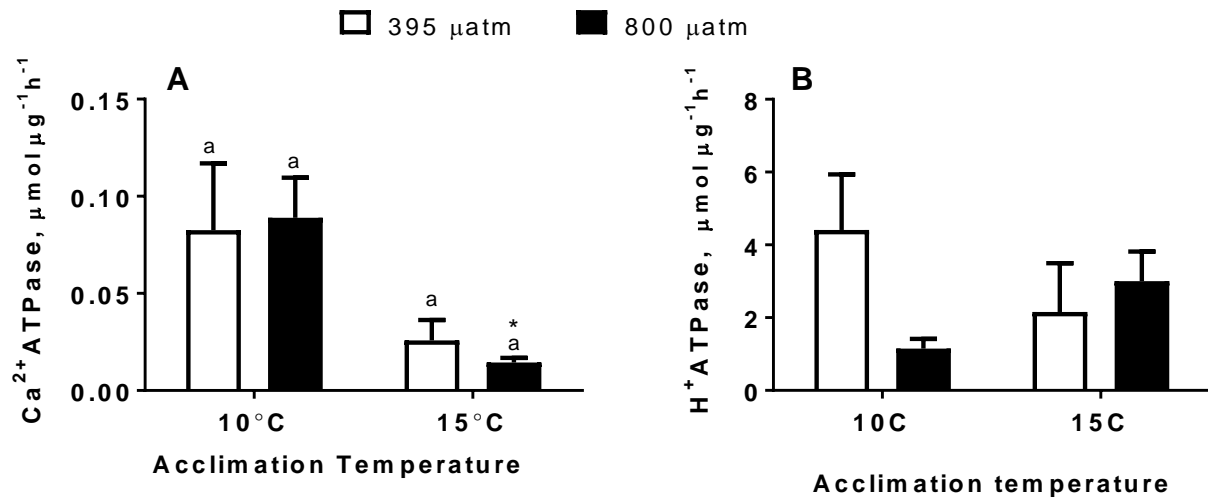

637

638

639

640

641

642

643

644

645

646

647 Table 1: Summary of water chemistry parameters during experimental exposure

648

649 Salinity, temperature, pH<sub>NBS</sub> and dissolved inorganic carbon (DIC) was measured in water samples  
 650 collected during the exposure. Average DIC was 2953.75±111.28 μmol kg<sup>-1</sup> SW. Other parameters are  
 651 calculated using coSYS. Data is represented as Means ± SEM. Same batch of sea water was used  
 652 throughout the course of the experiment with an average total alkalinity (TA) of 3098.40 mmol kg<sup>-1</sup> SW.

| Parameters                                                 | Assay Temperature |               |              |               |
|------------------------------------------------------------|-------------------|---------------|--------------|---------------|
|                                                            | 10 °C             |               | 15 °C        |               |
|                                                            | Normocapnia       | Hypercapnia   | Normocapnia  | Hypercapnia   |
|                                                            |                   |               |              |               |
| Salinity, PSU                                              | 30.04±0.07        | 30.50±0.03    | 30.15±0.04   | 30.14±0.05    |
| Temperature, °C                                            | 9.51±0.06         | 9.76±0.02     | 14.95±0.01   | 14.99±0.01    |
| pH <sub>NBS</sub>                                          | 8.13±0.00         | 7.91±0.00     | 8.18±0.00    | 7.92±0.00     |
| P <sub>CO2</sub> , μatm                                    | 585.39±39         | 1026.97±15.07 | 536.14±4.35  | 1069.41±13.90 |
| HCO <sub>3</sub> <sup>-</sup> , (μmol kg <sup>-1</sup> SW) | 2735.82±2.91      | 2863.82±3.49  | 2628.49±2.73 | 2823.22±2.89  |
| CO <sub>3</sub> <sup>2-</sup> , (μmol kg <sup>-1</sup> SW) | 155.50±1.23       | 100.37±1.49   | 202.67±1.18  | 118.56±1.24   |
| CO <sub>2</sub> , (μmol kg <sup>-1</sup> SW)               | 26.85±0.26        | 46.42±0.67    | 20.66±0.16   | 41.03±0.53    |
| Ω <sub>calcite</sub>                                       | 3.80±0.02         | 2.44±0.03     | 4.97±0.02    | 2.91±0.03     |
| Ω <sub>aragonite</sub>                                     | 2.38±0.01         | 1.54±0.02     | 3.15±0.01    | 1.84±0.01     |

653 N = 5 for DIC and N = 36-77 for other parameters.

654

655

656

657

658

659

660 Table 2: ANOVA results of the effects of exposure temperature,  $P_{CO_2}$  and their interaction on energy  
661 related indices and enzyme activities in *M.edulis*.

662

663 F-values are given with degrees of freedom for the factor and error in the subscript. Significant values  
664 ( $P < 0.05$ ) are highlighted in bold.

665 AEC, Adenylate energy change.

| Parameter                     | Temperature                  | $P_{CO_2}$              | Temperature X $P_{CO_2}$ |
|-------------------------------|------------------------------|-------------------------|--------------------------|
| Standard Metabolic Rate (SMR) | $F_{1,28}=24.97, P < 0.0001$ | $F_{1,28}=3.55, P=0.07$ | $F_{1,28}=0.00, P=0.98$  |
| Total Lipids                  | $F_{1,20}=16.63, P=0.0006$   | $F_{1,20}=0.16, P=0.69$ | $F_{1,20}=1.30, P=0.26$  |
| Glycogen                      | $F_{1,35}=0.17, P=0.68$      | $F_{1,35}=0.85, P=0.36$ | $F_{1,35}=0.56, P=0.45$  |
| ATP                           | $F_{1,20}=0.61, P=0.44$      | $F_{1,20}=3.16, P=0.09$ | $F_{1,20}=0.03, P=0.86$  |
| ADP                           | $F_{1,20}=3.14, P=0.09$      | $F_{1,20}=0.70, P=0.41$ | $F_{1,20}=0.38, P=0.54$  |
| AMP                           | $F_{1,20}=1.08, P=0.31$      | $F_{1,20}=0.14, P=0.71$ | $F_{1,20}=0.95, P=0.34$  |
| AEC                           | $F_{1,20}=2.39, P=0.13$      | $F_{1,20}=0.97, P=0.33$ | $F_{1,20}=0.16, P=0.69$  |
| Carbonic Anhydrase            | $F_{1,20}=6.70, P=0.01$      | $F_{1,20}=1.17, P=0.29$ | $F_{1,20}=0.04, P=0.83$  |
| Calcium ATPase                | $F_{1,19}=9.86, P=0.005$     | $F_{1,19}=0.01, P=0.90$ | $F_{1,20}=0.18, P=0.67$  |
| Proton ATPase                 | $F_{1,7}=0.03, P=0.86$       | $F_{1,17}=1.13, P=0.30$ | $F_{1,17}=3.25, P=0.08$  |

666

667

668

669

670

671

672

673

674

675

676

677 Table 3: Activation energies ( $E_a$ ) and Arrhenius breakpoint temperature (ABT) for specific activities of  
678 carbonic anhydrase in different tissues of *M. edulis*.

679

680  $E_a$  values highlighted in bold and marked with an asterisk are significant after the sequential Bonferroni  
681 corrections ( $P < 0.05$ ).  $Q_{10}$  temperature coefficients were calculated for the complete range of the studied  
682 temperatures (5-35 °C) and given in the last column.

683

684

|                  | Carbonic anhydrase |                                              |           |          |
|------------------|--------------------|----------------------------------------------|-----------|----------|
| Tissue           | ABT, °C            | $E_a$ , kJ mol <sup>-1</sup> K <sup>-1</sup> |           | $Q_{10}$ |
|                  |                    | Below ABT                                    | Above ABT |          |
| <i>M. edulis</i> |                    |                                              |           |          |
| Mantle           | N/a                | 39.82*                                       | -         | 1.68     |
| Gills            | N/a                | 43.81*                                       | -         | 1.84     |
| Hepatopancreas   | N/a                | 32.50*                                       | -         | 1.64     |
| Muscle           | N/a                | 40.98*                                       | -         | 1.77     |

685

686

687

688
